# Supplementary material for: Pendent group effects, PGEs, in P-donor ligands
Source: Royal Society of Chemistry journal article supplement (doi:10.1039/c3nj00263b), 2013-01-01
Supplement: c3nj00263b.pdf [file c3nj00263b.pdf]

ESI pages for:

**Pendent group effects, PGEs, in P-donor ligands**

By

Anthony J. Poë

Lash Miller Chemical Laboratories

University of Toronto, Toronto, Canada M5S 3H6

| <b>Table S1 Analysis of C-O stretching frequencies in Ni(CO)<sub>3</sub>L</b> | $\chi$ (exptl.) | pKa         | $\Theta$ | $\chi$ (calc.) |
|-------------------------------------------------------------------------------|-----------------|-------------|----------|----------------|
| L                                                                             | 8.55            | <b>8.65</b> | 118      | 7.095963       |
|                                                                               | 10.6            | <b>6.5</b>  | 122      | 9.763847       |
| PMe3                                                                          | 6.3             | <b>8.69</b> | 132      | 6.091295       |
| PPhMe2                                                                        | 5.4             | <b>8.64</b> | 132      | 6.159651       |
| PEt3                                                                          | 5.25            | <b>8.43</b> | 132      | 6.446746       |
| P(n-Pr)3                                                                      | 9.3             | <b>6.25</b> | 136      | 9.155643       |
| P(n-Bu)3                                                                      | 11.3            | <b>4.9</b>  | 140      | 10.72983       |
| PPhEt2                                                                        | 5.7             | <b>7.97</b> | 143      | 6.329205       |
| PPh2Et                                                                        | 13.25           | <b>2.73</b> | 145      | 13.3572        |
| P(i-Bu)3                                                                      | 11.3            | <b>3.84</b> | 145      | 11.8397        |
| PPh3                                                                          | 10.5            | <b>4.57</b> | 145      | 10.8417        |
| P(p-Me $\phi$ )3                                                              | 16.8            | <b>1.03</b> | 145      | 15.68131       |
| P(p-MeO $\phi$ )3                                                             | 15.7            | <b>1.97</b> | 145      | 14.39621       |
| P(p-Cl $\phi$ )3                                                              | 5.25            | <b>8.65</b> | 145      | 5.263851       |
| P(p-F $\phi$ )3                                                               | 1.4             | <b>9.7</b>  | 170      | 2.131976       |
| p(p-Me2N $\phi$ )3                                                            | 0               | <b>11.4</b> | 182      | -1.0064        |
| PCy3                                                                          |                 |             |          |                |
| P(t-Bu)3                                                                      |                 |             |          |                |

These data were used to provide the material for Table 2

**Table S2: Fe(CO)<sub>4</sub>L data: L = PX<sub>3</sub>**

| X3     | 0.012χ(exp) | 5.7pKa   | θ        | 0.012χ(est) | Δ      | π(p) |        |
|--------|-------------|----------|----------|-------------|--------|------|--------|
| Me3    | 0.0984      | 49.4     | 118      | 0.082546    | 0.015  |      |        |
| Et3    | 0.0696      | 49.6     | 132      | 0.066157    | 0.0034 |      |        |
| n-Bu3  | 0.0516      | 48.1     | 132      | 0.067655    | -0.016 |      |        |
| t-Bu3  | 0           | 65.1     | 182      | -0.00714    | 0.0074 |      |        |
| Ph3    | 0.06        | 15.6     | 145      | 0.085075    | -0.025 |      |        |
|        |             |          |          |             |        |      | -      |
| p-F3   | 0.084       | 7.94     | 145      | 0.092724    | 0.0087 |      |        |
| p-CF3  | 0.132       | -7.94    | 145      | 0.108581    | 0.0234 |      | Δ/π(p) |
| OMe3   | 0.24        | 14.8     | 107      | 0.082546    | 0.157  | 2.8  | 0.056  |
| OEt3   | 0.211       | 18.9     | 109      | 0.066157    | 0.145  | 2.9  | 0.05   |
| (OPh)3 | 0.274       | -11.5    | 128      | 0.067655    | 0.206  | 4.1  | 0.052  |
|        | -0.00116    | -0.001   | 0.268324 |             |        |      |        |
|        | 0.000438    | 0.000323 | 0.062903 |             |        |      |        |
|        | 0.820717    | 0.021361 | #N/A     |             |        |      |        |
|        | 9.15554     | 4        | #N/A     |             |        |      |        |
|        | 0.008356    | 0.001825 | #N/A     |             |        |      |        |

Units of 0.012χ(exp) etc. are kJ/mol

**Table S3 Analysis of C-O stretching frequencies in Co(NO)(CO)<sub>2</sub>L (kJ mol<sup>-1</sup> units)**

| L       | 100 ×<br>χ <sub>exptl</sub><br>× 0.0124 | 5.7pKa | θ   | πp  | χ(est.)<br>all Ls | χ(est.)<br>“non πs” |
|---------|-----------------------------------------|--------|-----|-----|-------------------|---------------------|
|         |                                         |        | 132 |     |                   |                     |
| PEt3    | 11.16                                   | 49.53  | 132 | 0   | 9.960647          | 10.35463            |
| PBu3    | 11.16                                   | 48.05  | 170 | 0   | 10.44012          | 10.8345             |
| PCy3    | 4.96                                    | 49.53  | 145 | 0   | 5.765778          | 5.109458            |
| PPh3    | 18.6                                    | 15.56  | 140 | 0   | 19.53065          | 19.57451            |
| PPh2Et  | 18.6                                    | 27.36  | 145 | 0   | 16.25982          | 16.43868            |
| PpMeOPh | 18.6                                    | 21.9   | 136 | 0   | 17.47672          | 17.51885            |
| PPhEt2  | 11.06                                   | 35.63  | 101 | 0   | 14.0222           | 14.30938            |
| mtpb    | 47.12                                   | 9.92   | 107 | 5   | 46.46502          | 27.47655            |
| P(Ome)3 | 33.48                                   | 14.82  | 109 | 2.8 | 35.30525          | 25.05961            |
| P(Obu)3 | 33.48                                   | 18.87  | 128 | 2.7 | 33.36741          | 23.4704             |
| P(Oph)3 | 47.12                                   | -11.4  |     | 4.1 | 46.74639          | 30.66242            |

**Table S4** Data for oxidation potentials for Cp(CO)LFe(COMe) in units of kJ mol<sup>-1</sup>

| L      | E0(exptl)<br>kJmol-1 | $\chi_d$ /kJmol-<br>1 | Ear | $\pi_p$ | Eo(est)<br>kJmol-1 | $\Delta$ | $\Delta/\pi_p$ | E0(est)<br>kJmol-1 |
|--------|----------------------|-----------------------|-----|---------|--------------------|----------|----------------|--------------------|
| ALL Ls |                      |                       |     |         |                    |          |                |                    |
| Me3    | 34.644               | 0.1026                | 0   | 0       | 34.27202           |          |                | 34.41806           |
| Et3    | 38.021               | 0.0756                | 0   | 0       | 37.53192           |          |                | 37.51526           |
| iPr3   | 42.364               | 0.0414                | 0   | 0       | 41.66111           |          |                | 41.43838           |
| Bu3    | 38.504               | 0.063                 | 0   | 0       | 39.0532            |          |                | 38.96062           |
| iBu3   | 38.021               | 0.0684                | 0   | 0       | 38.40122           |          |                | 38.34118           |
| Cy3    | 44.294               | 0.0168                | 0   | 0       | 44.63124           |          |                | 44.26027           |
| Ph3    | 24.222               | 0.159                 | 3   | 0       | 23.79759           |          |                | 23.73966           |
| p-MeO  | 28.13                | 0.126                 | 3   | 0       | 27.7819            |          |                | 27.52513           |
| p-Me   | 26.895               | 0.138                 | 3   | 0       | 26.33306           |          |                | 26.14859           |
| p-F    | 19.947               | 0.1884                | 3   | 0       | 20.24793           |          |                | 20.36715           |
| p-Cl   | 17.92                | 0.2016                | 3   | 0       | 18.6542            |          |                | 18.85297           |
| p-CF3  | 13.182               | 0.246                 | 3   | 0       | 13.29349           |          |                | 13.75979           |
| Ph2Me  | 25.959               | 0.1512                | 2   | 0       | 25.96096           |          |                | 26.0373            |
| Ph2Et  | 27.696               | 0.1332                | 2   | 0       | 28.13422           |          |                | 28.1021            |
| Ph2Pr  | 27.985               | 0.1344                | 2   | 0       | 27.98934           |          |                | 27.96445           |
| Ph2iPr | 30.494               | 0.1152                | 2   | 0       | 30.30748           |          |                | 30.16691           |
| Ph2Bu  | 27.792               | 0.1356                | 2   | 0       | 27.84446           |          |                | 27.8268            |
| Ph2Cy  | 31.264               | 0.1092                | 2   | 0       | 31.03191           |          |                | 30.85517           |
| PhMe2  | 30.591               | 0.126                 | 1   | 0       | 30.22516           |          |                | 30.33092           |
| PhEt2  | 33.003               | 0.1032                | 1   | 0       | 32.97795           |          |                | 32.94633           |
| PhBu2  | 33.679               | 0.1032                | 1   | 0       | 32.97795           |          |                | 32.94633           |

|         |         |        |   |     |          |       |       |          |
|---------|---------|--------|---|-----|----------|-------|-------|----------|
| PhCy2   | 36.188  | 0.0642 | 1 | 0   | 37.68669 |       |       | 37.42007 |
| OMe3    | 11.966  | 0.2112 | 0 | 2.8 | 21.16002 | -9.19 | -3.28 | 12.96235 |
| OEt3    | 14.958  | 0.1956 | 0 | 2.9 | 23.04351 | -8.09 | -2.79 | 14.43049 |
| OiPr3   | 18.046  | 0.1584 | 0 | 2.9 | 27.53491 | -9.49 | -3.27 | 18.69774 |
| OiBu3   | 14.379  | 0.186  | 0 | 3   | 24.20258 | -3.82 | -3.27 | 15.21035 |
| OC..Cl3 | 6.755   | 0.246  | 0 | 3.6 | 16.95838 | -10.2 | -2.83 | 6.399526 |
| etpb    | 4.0337  | 0.24   | 0 | 5   | 17.6828  | -13.7 | -2.73 | 2.588756 |
| OpMeO3  | 1.534   | 0.27   | 0 | 3.8 | 14.0607  | -12.5 | -3.3  | 3.003738 |
| OpCl3   | -0.6176 | 0.3264 | 0 | 4   | 7.251144 | -7.87 | -1.97 | -4.10869 |
| OpMe    | 0.8685  | 0.2688 | 0 | 4.1 | 14.20558 | -13.3 | -3.25 | 2.177312 |
| P(Oph)3 | -0.9071 | 0.2832 | 0 | 4.1 | 12.46697 | -13.4 | -3.27 | 0.525472 |

Av=-3.02±0.13

Alkyl and aryl ligands only

(sans 1.97)

| Alkyl and aryl ligands only |          |          |      |      | ALL LIGANDS |          |          |          |
|-----------------------------|----------|----------|------|------|-------------|----------|----------|----------|
| -1.22163                    | -120.737 | 46.65961 | #N/A | #N/A |             |          |          |          |
| 0.18742                     | 4.170139 | 0.318854 | #N/A | #N/A | -3.2136     | -1.4029  | -114.711 | 46.18742 |
| 0.995302                    | 0.554699 | #N/A     | #N/A | #N/A | 0.315056    | 0.287611 | 5.840892 | 0.50107  |
| 2012.685                    | 19       | #N/A     | #N/A | #N/A | 0.99464     | 1.022931 | #N/A     | #N/A     |
| 1238.568                    | 5.84612  | #N/A     | #N/A | #N/A | 1732.094    | 28       | #N/A     | #N/A     |
|                             |          |          |      |      | 5437.327    | 29.29887 | #N/A     | #N/A     |

**Table S5** Data for  $h\nu(\sigma \rightarrow \sigma^*)$  for  $\text{Mn}_2(\text{CO})_8\text{L}_2$

| L          | $h\nu/\text{kJ/mol}$ | 5.7pKa' | $\theta - 130$ | Ear | $h\nu(\text{est})$ | $\Delta$ | 100 $\Delta\pi$ | Eox | 100 $\Delta\pi$ |
|------------|----------------------|---------|----------------|-----|--------------------|----------|-----------------|-----|-----------------|
| PEt3       | 337                  | 45.41   | 2              | 0   | 335.4277           | 1.6      | 0               | 0   | 0               |
| P-n-Bu3    | 337                  | 49.46   | 2              | 0   | 335.9224           | 1.1      | 0               | 0   | 0               |
| PPhEt2     | 329                  | 33.89   | 3              | 1   | 330.5832           | -1.6     | 0               | 0   | 0               |
| P-i-Bu3    | 333                  | 47.7    | 6              | 0   | 334.588            | -1.6     | 0               | 0   | 0               |
| p-CF3*     | 316.4                | -7.93   | 13             | 3   | 316.3615           | 0        | 0               | 0   | 0               |
| p-Cl*      | 318.1                | 4.96    | 15             | 3   | 317.3764           | 0.7      | 0               | 0   | 0               |
| PPh3       | 319                  | 18.71   | 15             | 3   | 319.0559           | -1       | 0               | 0   | 0               |
| p-Me*      | 319                  | 25.45   | 15             | 3   | 319.8792           | -0.9     | 0               | 0   | 0               |
| p-MeO*     | 321.5                | 29.27   | 15             | 3   | 320.3458           | 1.2      | 0               | 0   | 0               |
| PPh2Et     | 324                  | 26.24   | 10             | 2   | 324.5324           | -0.5     | 0               | 0   | 0               |
| PPh2Cy     | 321.5                | 31.95   | 23             | 2   | 321.5918           | -0.1     | 0               | 0   | 0               |
| P-i-Pr3    | 329.5                | 56.37   | 30             | 0   | 328.9306           | 0.6      | 0               | 0   | 0               |
| PPhCy2     | 324                  | 47.35   | 32             | 1   | 324.1117           | -0.1     | 0               | 0   | 0               |
| PCy3       | 326.8                | 64.24   | 40             | 0   | 327.0934           | -0.3     | 0               | 0   | 0               |
| P(Ome)3    | 342                  | 4.74    | 0              | 0   | 331                | 11       | 9.6             | 3   | 9.6             |
| Pf(Ome)2   | 337                  | 8.44    | 0              | 1   | 328.3              | 8.7      | 5.2             | 2   | 5.2             |
| Pf2(Ome)   | 329                  | 11.92   | 2              | 2   | 325                | 4        | 2.5             | 1   | 2.5             |
| P(Oph)3    | 338                  | -15.92  | 0              | 0   | 328.5              | 9.5      | 11              | 3   | 11              |
| P(O-i-Pr)3 | 349.7                | 19.28   | 0              | 0   | 332.8              | 16.9     | 7.8             | 3   | 7.8             |

\* P(p-XC6H4)3

Table S5  
(cont)

| c        | b        | $\alpha$ | e        | $\Delta$ vs. Eox and<br>$100\Delta\pi\Delta$ | $\& 100\Delta\pi$ | for eqn (3) |
|----------|----------|----------|----------|----------------------------------------------|-------------------|-------------|
| -3.15741 | -0.27985 | 0.122151 | 330.4405 | 10.6154                                      | -1.98931          | 0.91177     |
| 0.504827 | 0.030662 | 0.035897 | 1.746342 | 1.914087                                     | 0.570391          | 1.19212     |
| 0.980284 | 1.095894 | #N/A     | #N/A     | 0.964236                                     | 1.424502          | #N/A        |
| 165.7383 | 10       | #N/A     | #N/A     | 40.44126                                     | 3                 | #N/A        |
| 597.1473 | 12.00984 | #N/A     | #N/A     | 164.1274                                     | 6.087621          | #N/A        |



Table S6 Data for IP analysis

| L          | IP/kJ/mol | c(d)/kJ/mol | IP(est) | $\pi\rho$ | $\Delta$ | $\Delta/n$ |       |
|------------|-----------|-------------|---------|-----------|----------|------------|-------|
|            |           |             | Ear     |           |          |            |       |
| PMe3       | 833       | 0.106       | 0       | 829.2616  | 0        |            |       |
| PMe2Ph     | 809       | 0.131       | 1       | 809.3409  | 0        |            |       |
| PMePh2     | 798       | 0.156       | 2       | 789.4201  | 0        |            |       |
| PEt3       | 804       | 0.0781      | 0       | 804.5445  | 0        |            |       |
| PBu3       | 781       | 0.0651      | 0       | 793.0276  | 0        |            |       |
| PPhBu2     | 775       | 0.098       | 1       | 780.1056  | 0        |            |       |
| P-i-Pr3    | 777       | 0.0428      | 0       | 773.2716  | 0        |            |       |
| PCy3       | 748       | 0.0174      | 0       | 750.7693  | 0        |            |       |
| P-t-Bu3    | 744       | 0           | 0       | 735.3543  | 0        |            |       |
| PPh3       | 758       | 0.164       | 3       | 754.4387  | 0        |            |       |
| p-Me2N     | 666       | 0.0651      | 3       | 666.8214  | 0        |            |       |
| p-MeO      | 722       | 0.13        | 3       | 724.3175  | 0        |            |       |
| p-Me       | 733       | 0.143       | 3       | 735.8344  | 0        |            |       |
| p-F        | 784       | 0.195       | 3       | 781.9021  | 0        |            |       |
| p-Cl       | 789       | 0.208       | 3       | 793.4191  | 0        |            |       |
| p-F3C      | 835       | 0.254       | 3       | 834.1713  | 0        |            |       |
| Etpb       | 960       | 0.25        | 0       | 956.8338  | 5        | 3.17       | 1.06  |
| P(Ome)3    | 883       | 0.222       | 0       | 932.0281  | 2.8      | -49        | -16.3 |
| P(Oet)3    | 865       | 0.196       | 0       | 908.9942  | 2.9      | -44        | -14.7 |
| P(Oph)3    | 849       | 0.293       | 0       | 994.9283  | 4.1      | -146       | -48.7 |
| P(O-i-Pr)3 | 845       | 0.166       | 0       | 882.4167  | 2.9      | -37.4      | -12.5 |
| PMe2Cl     | 888       | 0.244       | 0       | 951.5183  | 1.6      | -63.4      | 63.4  |
| PMeCl2     | 951       | 0.383       | 0       | 1074.661  | 3.5      | -124       | -62   |

|           |          |          |      |          |     |      |       |            |
|-----------|----------|----------|------|----------|-----|------|-------|------------|
| PCl3      | 1033     | 0.521    | 0    | 1196.918 | 5.3 | -164 | -54.7 |            |
| PPhCl2    | 936      | 0.402    | 1    | 1049.425 | 3.5 | -155 | -56.5 |            |
| PPh2Cl    | 844      | 0.283    | 2    | 901.9316 | 1.8 | -142 | -58   |            |
| P-t-BuCl2 | 897      | 0.347    | 0    | 1042.768 | 3.5 | -146 | -73   |            |
| -42.0687  | 885.9179 | 735.3543 | #N/A |          |     |      |       | Av. Of Cl- |
| 1.550391  | 31.10416 | 2.770756 | #N/A |          |     |      |       | containing |
| 0.985546  | 5.591398 | #N/A     | #N/A |          |     |      |       | ligands=   |
| 443.2063  | 13       | #N/A     | #N/A |          |     |      |       | 61.3±2.7   |
| 27712.57  | 406.4286 | #N/A     | #N/A |          |     |      |       |            |
